# Supplementary material
Source: PubMed Central journal article supplement (PMC4526462)

# Supplemental Figure 1

## A

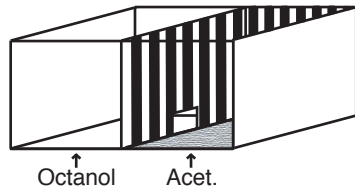

## B

|          | Group                                          |                                                  |
|----------|------------------------------------------------|--------------------------------------------------|
|          | Saline                                         | Nicotine                                         |
| Day 1    | Pre-test                                       | Pre-test                                         |
| Day 2 AM | I.p. saline in initially non-preferred chamber | I.p. nicotine in initially non-preferred chamber |
| Day 2 PM | I.p. saline in initially preferred chamber     | I.p. saline in initially preferred chamber       |
| Day 3    | Test                                           | Test                                             |

## C

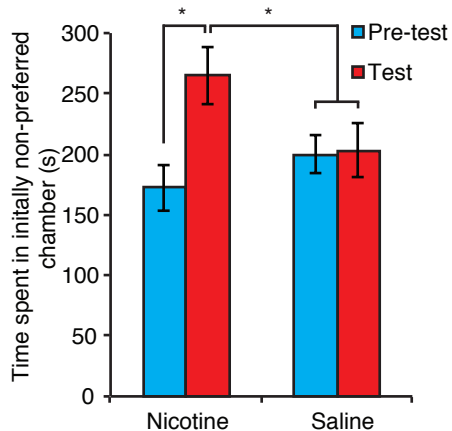

Supplement: NIHMS705173-supplement-2.pdf [file NIHMS705173-supplement-2.pdf]
