# Supplementary material
Source: PubMed Central journal article supplement (PMC4526462)
Supplement: NIHMS705173-supplement-8.pdf [file NIHMS705173-supplement-8.pdf]

# Supplemental Figure 7

Fiber tip placements for physiological responses to optical stimulation assay

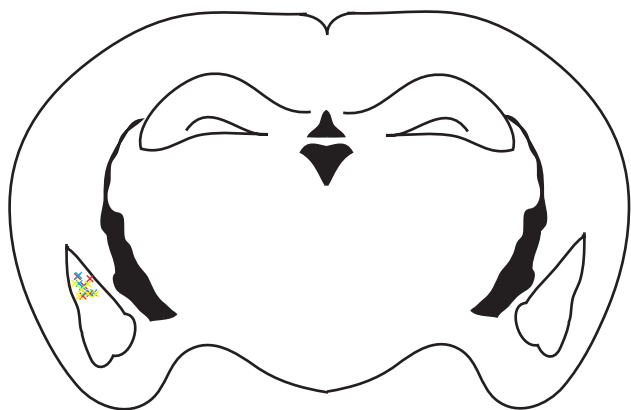

× Shock ChR2 × Nicotine ChR2 × Synapsin ChR2

Fiber tip placements for instrumental conditioning assay

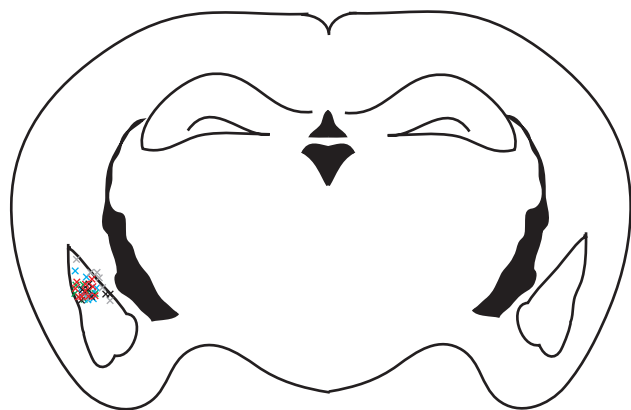

× Shock ChR2 × Nicotine ChR2 × Shock GFP × Nicotine GFP × CS paired ChR2

Fiber tip placements for behavioral response to optical stimulation assay

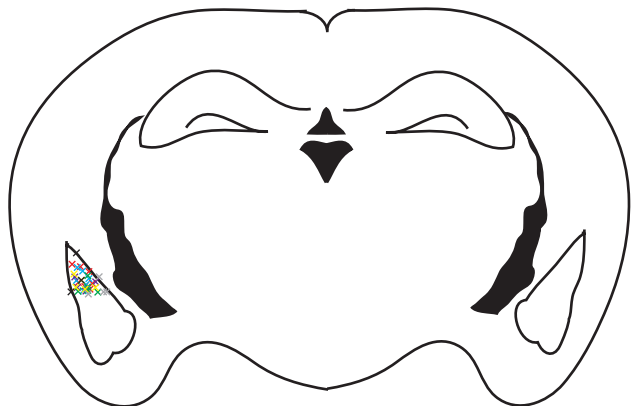

× Shock ChR2 × Nicotine ChR2 × Untreated ChR2 × Context ChR2  
× Synapsin ChR2 × Shock GFP × Nicotine GFP

Fiber tip placements for response to optical stimulation of CS representation

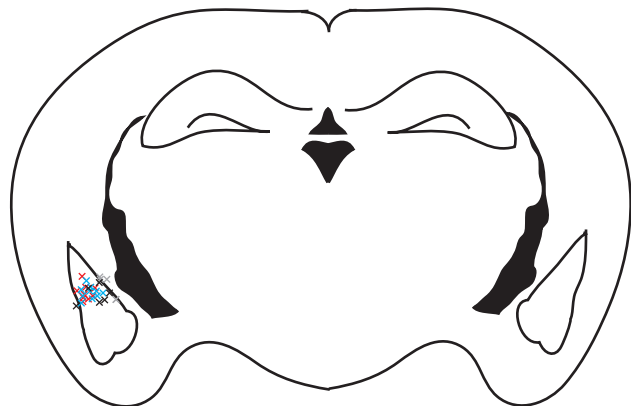

× CS paired ChR2 × CS unpaired ChR2 × CS paired GFP × CS unpaired GFP

Fiber tip placements for fear conditioning assay

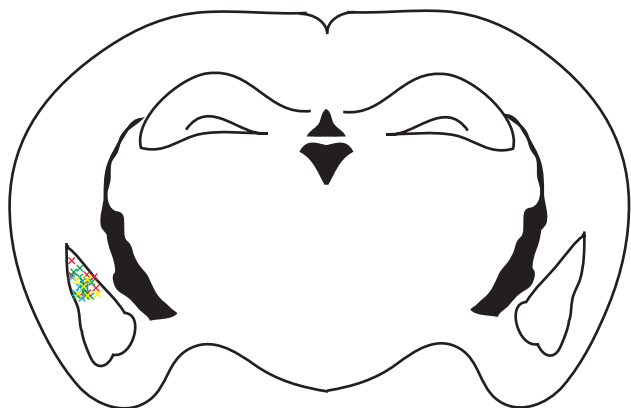

× Shock paired × Nicotine paired × Shock unpaired × Synapsin

Fiber tip placements for halorhodopsin assay

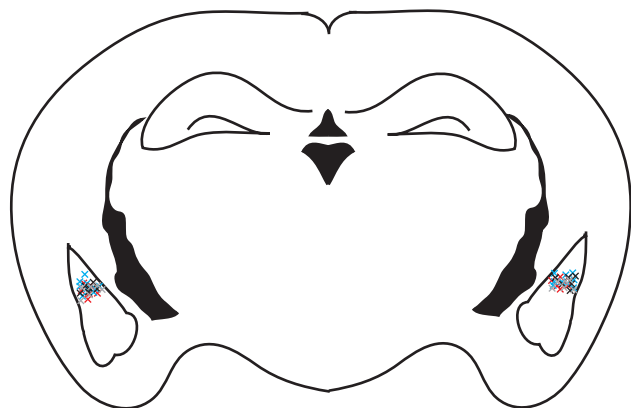

× Shock NpHR × Nicotine NpHR × Shock GFP × Nicotine GFP

Fiber tip placements for odor conditioning assay

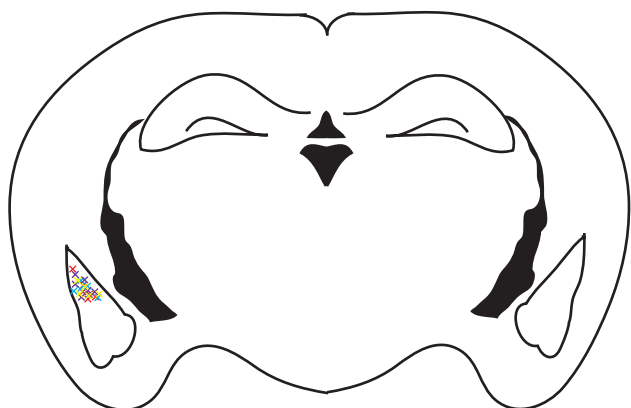

× Shock × Nicotine × Untreated × Synapsin
