# Supplementary material
Source: PubMed Central journal article supplement (PMC4526462)

Supplemental Figure 2

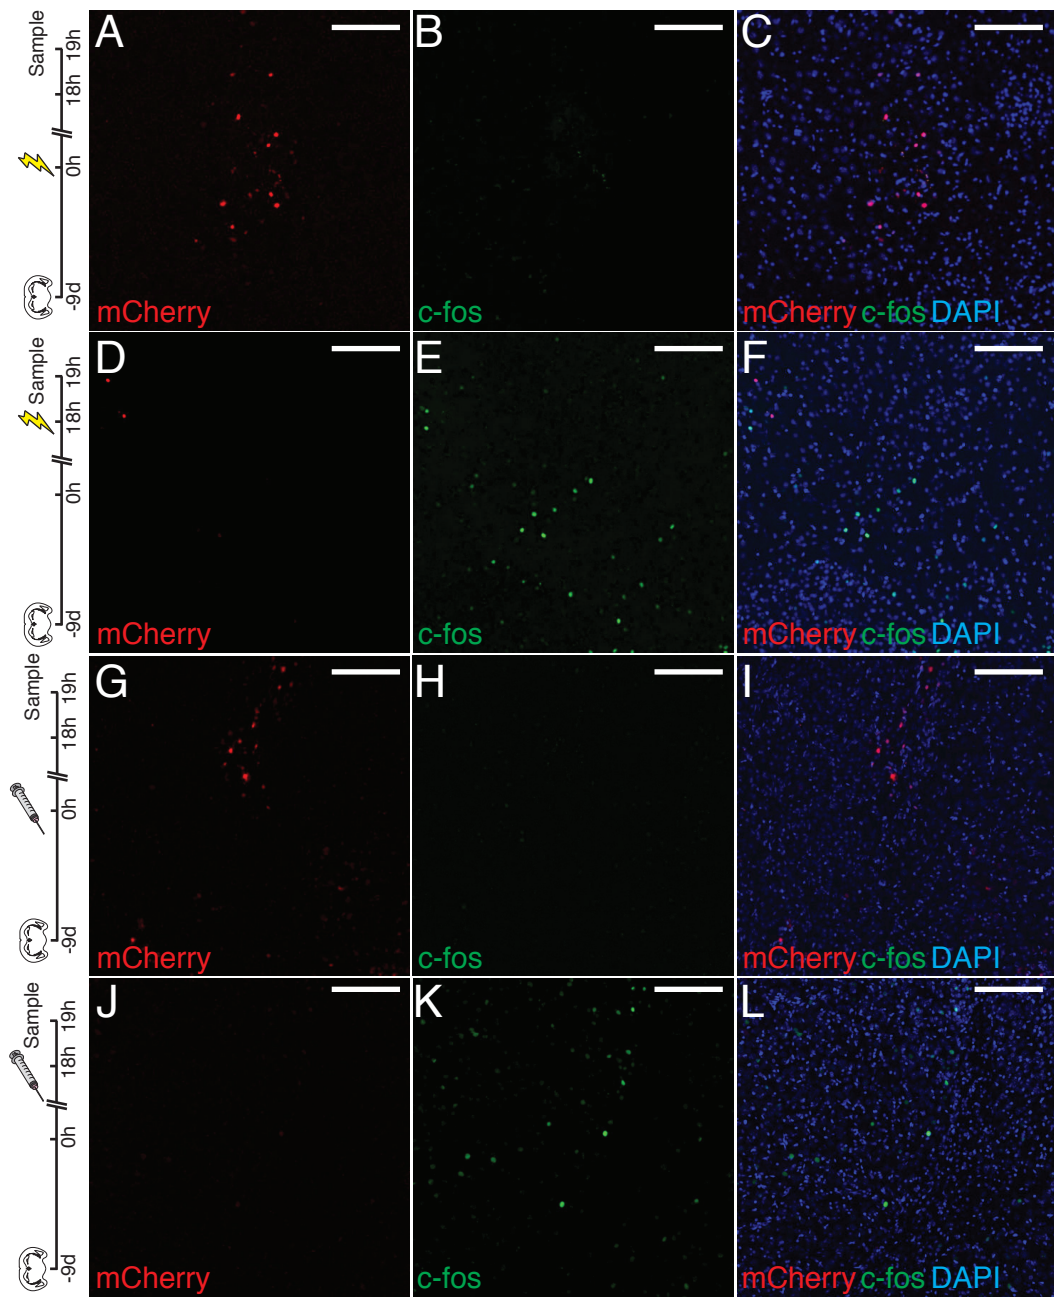

Supplement: NIHMS705173-supplement-3.pdf [file NIHMS705173-supplement-3.pdf]

# Supplemental Figure 3

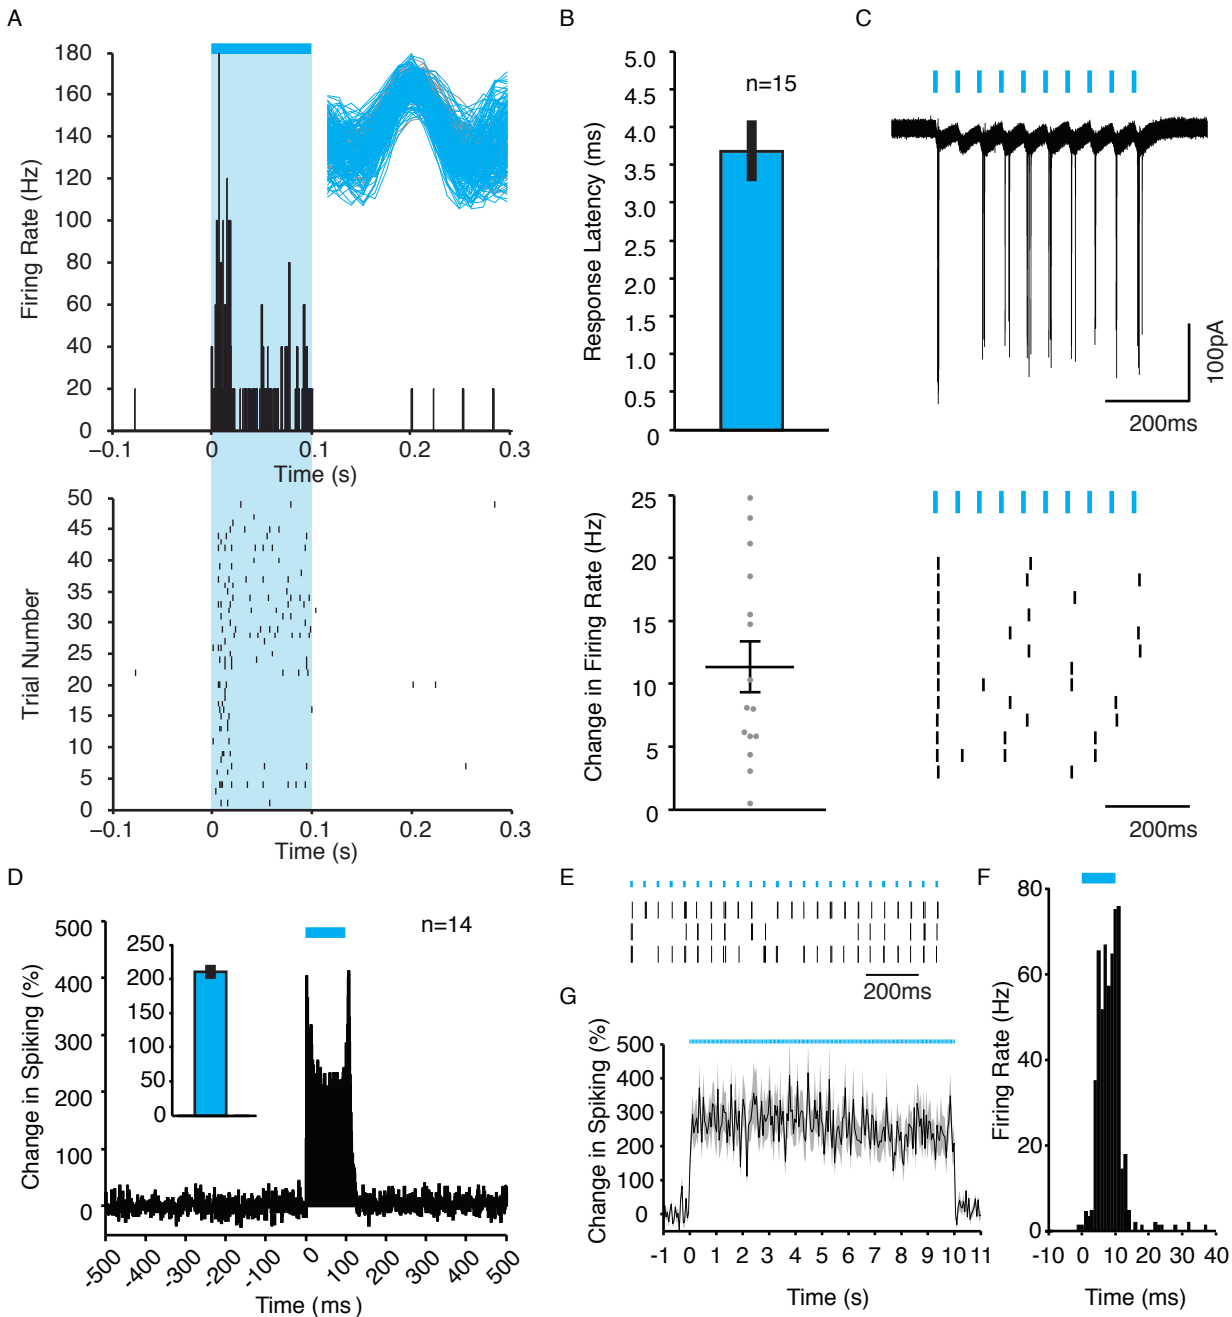

Supplement: NIHMS705173-supplement-4.pdf [file NIHMS705173-supplement-4.pdf]

# Supplemental Figure 4

## A

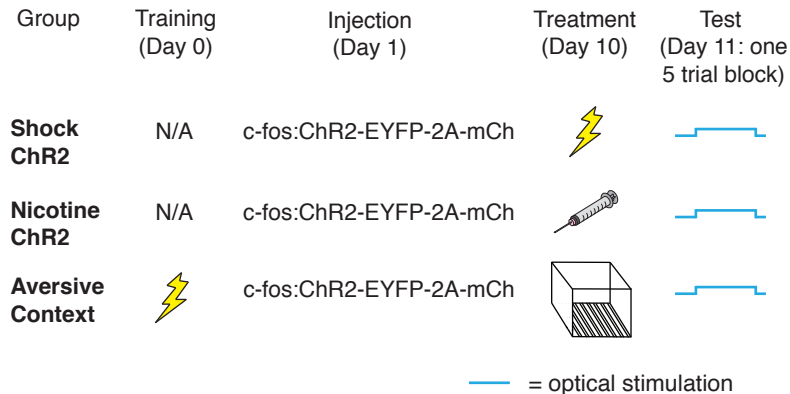

## B

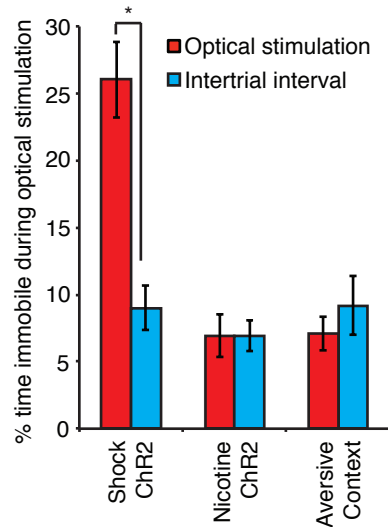

Supplement: NIHMS705173-supplement-5.pdf [file NIHMS705173-supplement-5.pdf]

Supplemental Figure 5

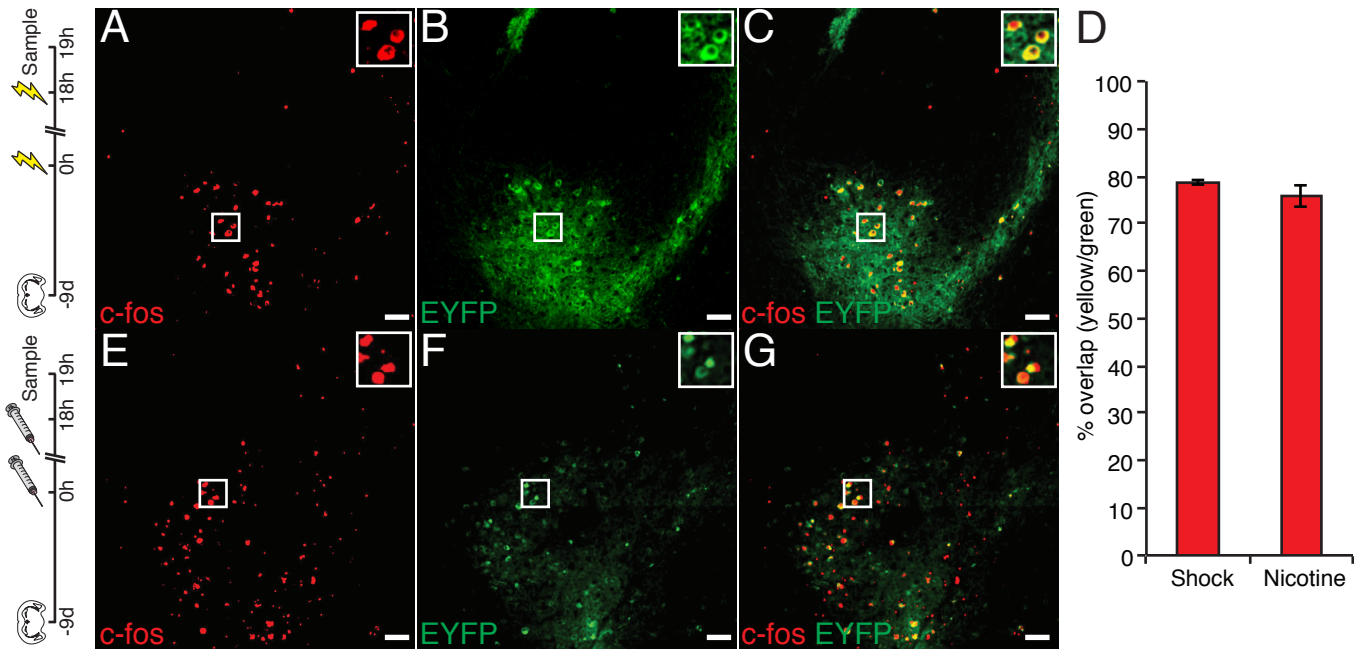

Supplement: NIHMS705173-supplement-6.pdf [file NIHMS705173-supplement-6.pdf]

# Supplemental Figure 6

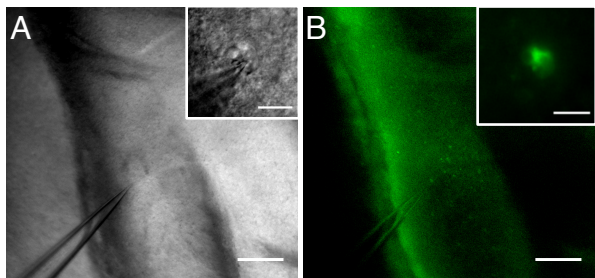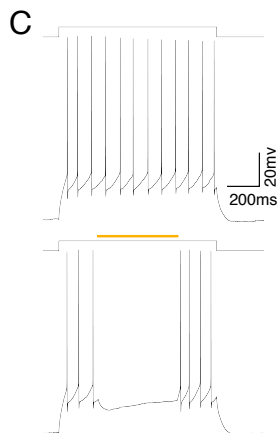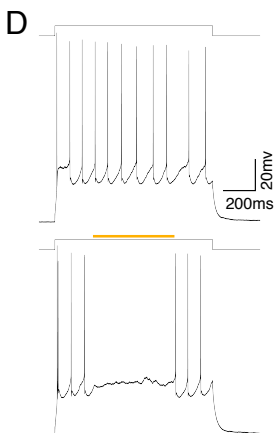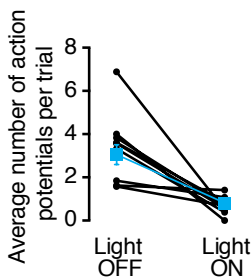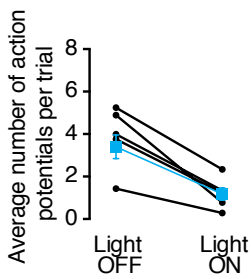

Supplement: NIHMS705173-supplement-7.pdf [file NIHMS705173-supplement-7.pdf]
